1 ***GIGANTEA* promotes sorghum flowering by stimulating floral activator gene expression**

2

3 Frank G. Harmon<sup>1\*</sup>, Junping Chen<sup>2</sup>, and Zhanguo Xin<sup>2</sup>

4 <sup>1</sup>Plant Gene Expression Center, USDA-ARS, Albany, CA 94710 USA and Plant & Microbial

5 Biology Department, University of California, Berkeley CA 94720 USA

6 <sup>2</sup>Plant Stress and Germplasm Development Unit, Cropping Systems Research Laboratory, U.S.

7 Department of Agriculture-Agricultural Research Service, Lubbock, Texas 79415 USA

8

9 \*Corresponding Author: [fharmon@berkeley.edu](mailto:fharmon@berkeley.edu); (510) 559-5939

10 Junping Chen: [Junping.Chen@ars.usda.gov](mailto:Junping.Chen@ars.usda.gov)

11 Zhanguo Xin: [Zhanguo.Xin@ars.usda.gov](mailto:Zhanguo.Xin@ars.usda.gov)

12 **iv. Funding**

13 This work was supported by USDA-ARS CRIS projects 2030-21000-039-00D and 2030-21000-  
14 049-00D to F.G.H.

15

16 **v. Abstract**

17 The C4 grass *Sorghum bicolor* is an important grain and subsistence crop, animal forage, and  
18 cellulosic biofuel feedstock that is tolerant of abiotic stresses and marginal soils. Sorghum is  
19 short-day flowering, an obstacle for adaptation as a grain crop but a benefit as a biofuel  
20 feedstock. To identify genes underlying sorghum photoperiodic flowering behavior this study  
21 characterized the *Sbgi-ems1* nonsense mutation in the sorghum *GIGANTEA* (*SbGI*) gene from a  
22 sequenced M4 EMS-mutagenized BTx623 population. *Sbgi-ems1* plants had reduced stature and  
23 leaf blades exhibiting increased lateral growth combined with reduced proximal-distal growth.  
24 Mutant plants flowered later than normal siblings under long-day conditions provided by  
25 greenhouse or field. Delayed flowering in *Sbgi-ems1* plants accompanied by an increase in  
26 internode number, indicating an extended vegetative growth phase prior to flowering. *Sbgi-ems1*  
27 plants had reduced expression of floral activator genes *SbCO* and *SbEhd1* and downstream FT-  
28 like florigen genes *SbFT*, *SbCN8*, and *SbCN12*. Therefore, *SbGI* accelerates flowering by  
29 promotion of *SbCO* and *SbEhd1* expression. Circadian clock-associated genes *SbTOC1* and  
30 *SbLHY* had disrupted expression in *Sbgi-ems1* plants. This work demonstrates *SbGI* is a key  
31 upstream activator in the regulatory networks dictating sorghum flowering time and growth, as  
32 well as gene expression regulation within the circadian clock.

33

34

35 **vi. Key Words**

36 circadian clocks, florigen, flowering time, gene expression, GIGANTEA, *Oryza sativa*,

37 photoperiodic flowering, *Sorghum bicolor*, *Zea mays*

38

39 **vii. Acknowledgements**

40 Thank you to Emma Kovak and Carine Marshall for feedback and advice. Julianne Elliot and

41 Parkesh Suseendran provided invaluable technical assistance. We thank Lia Poasa and Julie

42 Calfas from the PGEC greenhouse and UC Berkeley Greenhouse Facilities staff Tina Wistrom

43 and Al Hunter for excellent care of plants. This work was supported by USDA-ARS CRIS

44 projects 2030-21000-039-00D and 2030-21000-049-00D to F.G.H.

45

46 **Authorship**

47 Xin and Chen generated and characterized the sequenced EMS-mutagenized sorghum population

48 containing the *Sbgi-ems1* allele. Chen performed early experiments on populations with the *Sbgi-*

49 *ems1* allele. Harmon conceived, designed, and performed the research. Harmon wrote the

50 manuscript with input from the co-authors.

51

52 **Conflicts of Interest:** The authors declare no conflicts of interest

## 53 **Summary Statement**

54 Sorghum *GIGANTEA* contributes to flowering time, growth, and the circadian clock with  
55 activities opposite to its maize homolog. *GI* occupies a conserved position within regulatory  
56 networks but has plastic activity.

57

## 58 **Introduction**

59 Sorghum is a C4 grass native to Africa that is a key grain and subsistence crop, an animal forage,  
60 and a promising cellulosic biofuel feedstock. Advantages of sorghum are its high productivity in  
61 marginal soils and under arid conditions. Day length is an important signal for triggering  
62 flowering in sorghum and as a short-day (SD) plant flowering is promoted when day length falls  
63 below a critical threshold (Craufurd et al., 1999; Quinby, 1974). This sensitivity to day length is  
64 at once an obstacle for sorghum adaptation as a grain crop and a benefit for its development as a  
65 biofuel feedstock (Mullet et al., 2014). To develop sorghums for either purpose, it is important to  
66 understand the genes and regulatory pathways that control photoperiodic flowering.

67 Photoperiodic flowering is the regulation of flowering time according to day length. This  
68 behavior is enforced by an integrated set of transcriptional and post-transcriptional signaling  
69 networks that not only promote flowering under inductive photoperiods but also repress  
70 flowering under noninductive photoperiods. A highly conserved point of integration for  
71 photoperiodic flowering signals is the *CONSTANS (CO)* - *FLOWERING LOCUS T (FT)*  
72 regulatory module (Young Hun Song, Shim, Kinmonth-Schultz, & Imaizumi, 2015), named for  
73 genes first discovered in *Arabidopsis thaliana*. *CO* encodes a member of a family of B-box CCT  
74 domain transcription factors widely conserved in plants (Griffiths, Dunford, Coupland, & Laurie,  
75 2003; Putterill, Robson, Lee, Simon, & Coupland, 1995). *Arabidopsis FT* encodes a member of

76 the larger plant PEBP-related family conserved throughout flowering plants that contains smaller  
77 group of FT-like florigen-related proteins (Danilevskaya, Meng, Hou, Ananiev, & Simmons,  
78 2008; Turck, Fornara, & Coupland, 2008). According to the florigen hypothesis, a mobile signal  
79 originating in leaves transmits the flowering signal to the shoot apical meristem to promote  
80 flowering (Pennazio, 2004). Leaf expressed FT-like proteins in Arabidopsis, rice, tomato, and  
81 cucurbits serve as molecular florigen signals to trigger the shift from vegetative to floral  
82 development at the shoot apical meristem (Jaeger & Wigge, 2007; Lifschitz et al., 2006; Lin et  
83 al., 2007; Notaguchi et al., 2008; Tamaki, Matsuo, Wong, Yokoi, & Shimamoto, 2007).

84 The primary role of *CO* is regulation of *FT* expression and whether *CO* protein activates or  
85 represses its *FT* target genes varies among plants. In Arabidopsis, *CO* activates *FT* expression to  
86 promote flowering under floral inductive long-day (LD) photoperiods (Samach et al., 2000; Y.  
87 H. Song, Smith, To, Millar, & Imaizumi, 2012; Valverde et al., 2004). In contrast, the rice *CO*  
88 ortholog *Heading date 1 (Hd1)* upregulates expression of the *FT* ortholog *Heading date 3a*  
89 (*Hd3a*) in floral inductive SD photoperiods and represses it in LD (Kojima et al., 2002; Yano et  
90 al., 2000). *Hd1* also represses expression of rice *Early heading date 1 (OsEhd1)*. *OsEhd1*  
91 encodes a B-type response regulator that promotes *Hd3a* expression under SD separate from *Hd1*  
92 (Doi et al., 2004; Itoh, Nonoue, Yano, & Izawa, 2010; Zhao et al., 2015). An upstream activator  
93 of *OsEhd1* expression is *Early heading date 2 (Ehd2)* encoding a zinc finger transcription factor,  
94 which is an ortholog of the maize floral activator *INDETERMINATE 1 (ID)* (Matsubara et al.,  
95 2008). The maize *id1* mutant is very late flowering (Colasanti, Yuan, & Sundaresan, 1998). The  
96 maize florigen-related gene *Zea mays CENTRORADIALIS 8 (ZCN8)* is a presumed florigen,  
97 since silencing *ZCN8* expression delays flowering (Meng, Muszynski, & Danilevskaya, 2011).  
98 *CONSTANS OF Zea mays1 (CONZ1)* is a co-linear ortholog of rice *Hd1* (Miller, Muslin, &

99 Dorweiler, 2008), but genetic and molecular studies have not tested the contribution of *CONZI*  
100 to regulation of *ZCN8*.

101 Sorghum *CONSTANS* (*SbCO*) acts upstream to promote expression of *SbEhd1* and several  
102 florigen-related genes in both LD and SD photoperiods (Yang, Weers, Morishige, & Mullet,  
103 2014). Of the thirteen PEBP-family genes in sorghum, sorghum *CENTRORADIALIS 8* (*SbCN8*)  
104 is the co-linear ortholog of maize *ZCN8* and *SbFT* is the co-linear ortholog of rice *Hd3a* (R L  
105 Murphy et al., 2011). An additional PEBP-family gene orthologous between maize and sorghum  
106 is *SbCN12* (R L Murphy et al., 2011; Yang et al., 2014). Both *SbCN8* and *SbCN12* possess  
107 florigen activity when overexpressed in Arabidopsis (Wolabu et al., 2016). Collectively, *SbFT*,  
108 *SbCN8*, *SbCN12* are regulated by *SbCO* and *SbEhd1* (Rebecca L. Murphy et al., 2014; Yang et  
109 al., 2014), consistent with this set of genes acting as the CO-FT module in sorghum.

110 An additional repressor of flowering upstream of *SbCO* is the sorghum *PSEUDORESPONSE*  
111 *REGULATOR 37* (*SbPRR37*) (R L Murphy et al., 2011). *SbPRR37* encodes a member of a family  
112 of transcriptional repressors originally discovered as core circadian clock genes in Arabidopsis  
113 (Farre & Liu, 2013), but *SbPRR37* has no contribution to circadian clock function (R L Murphy  
114 et al., 2011). Differentially functional *SbPRR37* alleles underlie the flowering time-associated  
115 *Maturity* locus *Ma1*, which has the largest impact on sorghum flowering time (Quinby, 1974).  
116 Inactive *mal/Sbprrr37* alleles confer early flowering in LD conditions and played an important  
117 role in early domestication of sorghum (Quinby, 1967). Under LD conditions, *SbPRR37* inhibits  
118 flowering by repressing expression of flowering activators *SbEhd1* and *SbCO* to ultimately  
119 suppress expression of florigen-related genes like *SbFT*, *SbCN8*, and *SbCN12* (R L Murphy et  
120 al., 2011).

121 *GIGANTEA (GI)* is a gene identified in early genetic screens for delayed flowering mutants in  
122 *Arabidopsis* (Koornneef, Hanhart, & van der Veen, 1991; Redei, 1962). *GI* participates in  
123 flowering time control, the circadian clock, and a wide range of other physiological activities  
124 (Mishra & Panigrahi, 2015). In *Arabidopsis*, *GI* stimulates flowering by promoting *FT*  
125 expression in LD through direct transcriptional regulation of *FT* and post-transcriptional  
126 inactivation of *CO* repressors (Park et al., 1999; Sawa & Kay, 2011; Sawa, Nusinow, Kay, &  
127 Imaizumi, 2007; Suarez-Lopez et al., 2001). Within the circadian clock, *GI* protein is  
128 fundamental to the protein complex that targets the core circadian clock transcriptional repressor  
129 *TIMING OF CAB 1 (TOC1)* for degradation by the ubiquitin-26S proteasome system (Kim et al.,  
130 2007; Mas, Kim, Somers, & Kay, 2003). Tight regulation of *TOC1* protein activity is integral to  
131 a mutual negative regulatory feedback loop between *TOC1* and another core circadian clock  
132 gene *LATE ELONGATED HYPOCOTYL (LHY)* (Alabadi et al., 2001; Gendron et al., 2012;  
133 Huang et al., 2012). *Sorghum* has homologs of both *TOC1* and *LHY* (R L Murphy et al., 2011).

134 *GI* is also an important component of photoperiodic flowering time networks in grasses. *gi*  
135 mutants in rice and maize alter flowering time behavior. Under greenhouse conditions the rice  
136 *osgi-1* mutant allele delays flowering under SD photoperiods, but not in LD conditions, and only  
137 slightly delays flowering in the field (Izawa et al., 2011). *OsGI* is important for blue light-  
138 promoted induction of rice *Ehd1* expression as part of the mechanism for critical SD day-length  
139 recognition (Itoh et al., 2010). Maize has two paralogous *GI* genes, *GIGANTEA1 (GII)* and  
140 *GIGANTEA2* (Miller 2008; Mendoza 2012). *gi1* mutants flower earlier in LD, but not SD, and  
141 have elevated expression of *ZCN8* and *CONZI*, indicating *GII* is an upstream repressor in LD  
142 (Bendix, Mendoza, Stanley, Meeley, & Harmon, 2013).

143 The role played by *SbGI* in regulation of sorghum flowering is not well characterized. A  
144 comparative genomic study of 219 African sorghum accessions identified single nucleotide  
145 polymorphisms (SNPs) at *SbGI* significantly associated with photoperiod sensitivity (Bhosale et  
146 al., 2012). Two associated SNPs caused non-synonymous amino acid changes and a third  
147 represented a frameshift mutation. *SbGI* expression has a diel rhythm like all known *GI* genes  
148 where peak expression occurs 8 to 10 hours after dawn and this timing is independent of  
149 photoperiod (R L Murphy et al., 2011). *SbPRR37* does not contribute substantially to regulation  
150 of *SbGI* (R L Murphy et al., 2011).

151 Here we describe a novel mutant allele in the *SbGI* gene, *Sbgi-ems1*, identified in a sequenced  
152 M4 EMS-mutagenized population (Jiao et al., 2016). Plants carrying this nonsense mutation,  
153 which truncates GI protein by two thirds, exhibited a number of alterations in growth and  
154 development compared to non-mutant normal siblings. Mutant plants had reduced stature and  
155 changes in the orientation of leaf blade growth. The *Sbgi-ems1* allele delayed flowering under  
156 LD photoperiod conditions provided by greenhouse or field. Delayed flowering in *Sbgi-ems1*  
157 accompanied an increase in internode number, indicating an extended vegetative growth phase  
158 prior to flowering. This sorghum allele also resulted in reduced expression of the floral activators  
159 *SbCO* and *SbEhd1*, as well as limited expression of the FT-like florigen genes *SbFT*, *SbCN8*, and  
160 *SbCN12*. These observations indicate *SbGI* promotes *SbCO* and *SbEhd1* expression, which  
161 accelerates flowering time under LD photoperiods. Circadian clock gene expression also was  
162 disrupted in *Sbgi-ems1* plants. *SbTOC1* expression was elevated and *SbLHY* expression strongly  
163 reduced, consistent with *SbGI* playing an important role in the regulatory network of the  
164 sorghum circadian clock.



165 **Materials and Methods**

166 **Plant stocks and environmental conditions**

167 All sorghum lines are the BTx623/ATx623 genetic background. The ARS223 line is from a  
168 collection of 256 whole genome sequenced M4 EMS-mutagenized sorghums lines described by  
169 Jiao et al. (2016). Plants were screened for the *Sbgi-ems1* mutation in *SbGI* by Derived Cleaved  
170 Amplified Polymorphic Sequences PCR with the primers in Supplemental Table S1. The PCR  
171 fragment amplified from the *Sbgi-ems1* locus was resistant to the XcmI restriction enzyme (New  
172 England Biolabs) and the product from normal *SbGI* locus was cleaved by this enzyme.  
173 Screening of 24 plants from the M4 ARS223 population yielded one plant heterozygous for the  
174 *Sbgi-ems1* allele and this plant was used as pollen donor for a cross to a male sterile ATx623  
175 panicle. Progeny of this cross were used for all subsequent experiments.

176 Plants in the greenhouse were grown under LD conditions of 16-hour days and 8-hour nights.  
177 Natural sunlight was supplemented with LumiGrow Pro325 LEDs. Daytime temperature was set  
178 to 26°C and nighttime temperature was set to 20°C. Seedlings for growth measurements and  
179 gene expression were sown in 4-inch peat pots filled with SuperSoil (The Scotts Company),  
180 supplemented with a ½ teaspoon of 14-14-14 N-P-K slow release fertilizer. Plants for flowering  
181 experiments were started in the same fashion then transplanted when seedlings reached the 3-leaf  
182 stage (10 days-old) to 13-liter pots filled with corn soil (composed of aged wood fines, green  
183 waste compost, fir bark, grape compost, rice hulls, chicken manure, red lava, and sandy loam  
184 mixed by American Soil and Stone, Richmond, CA). Greenhouse plants were watered twice  
185 daily and received 20-20-20 N-P-K fertilizer once a week after being transplanted to 13-liter  
186 pots. Field grown plants were maintained in rows at Oxford tract on the University of California,  
187 Berkeley campus and watered to soil saturation once weekly by drip irrigation. For each trial,

188 field grown plants were started from seed directly at Oxford tract or transplanted as 4-5 leaf  
189 individuals (2 weeks-old) started in peat pots as above. Plants in the field were grown at the  
190 Oxford tract on the UC Berkeley campus from late May 2018 to September 2018.

191

## 192 **Growth measurements**

193 Plants were grown under greenhouse conditions to the 6-7 leaf stage (4-6 weeks) and measured  
194 at this point for height and leaf blade dimensions. Height corresponded to the distance between  
195 the soil surface and the collar of the newest fully expanded leaf. The 6<sup>th</sup> leaf was dissected from  
196 the same plants and its length measured from the tip to the ligule. Width was measured at the  
197 midpoint of the blade, determined by folding the leaf blade in half. The same measurements were  
198 made for the 6<sup>th</sup> leaf below the flag leaf from post-flowering *Sbgi-ems1* and normal plants.

199 Internodes above the first internode with prop roots were counted on post-flowering plants from  
200 flowering time trials.

201

## 202 **Flowering time**

203 Plants grown under greenhouse conditions were individually scored for the number of days from  
204 sowing to reach boot stage and flowering, while field grown plants were scored for boot stage  
205 only, due to inhibition of anthesis and stigma exertion by the cool temperatures at the Oxford tract.  
206 Boot stage was scored as the first day when the entire flag leaf collar was visible in the leaf  
207 whorl. Flowering stage was scored as the first day of anthesis for fertile plants or stigma exertion  
208 for male sterile plants.

209

210

## 211 **Gene Expression**

212 Greenhouse grown 6<sup>th</sup> leaf stage plants were sampled at 0, 8 and 16 hours after dawn. Dawn was  
213 when supplemental lights came on at 7 AM. Leaf samples were taken by cutting directly across  
214 the 6<sup>th</sup> leaf ligule with scissors. Two biological replicates were collected for each genotype at  
215 each time point. A biological replicate consisted of pooled tissue from three individuals of the  
216 same genotype. Leaf samples were flash frozen in liquid nitrogen. After tissue was ground under  
217 liquid nitrogen, total RNA was extracted with TRIzol Reagent (ThermoFisher Scientific)  
218 according to the manufacturer's recommendations. 1.5 µg total RNA for each sample was  
219 treated with dsDNase (ThermoFisher Scientific) to remove contaminating genomic DNA and  
220 used as a template for cDNA synthesis with the Maxima H Minus First Strand cDNA synthesis  
221 Kit (ThermoFisher Scientific) according to the manufacturer's recommendations. cDNA diluted  
222 in half with water served as template for two technical replicate real-time quantitative PCR  
223 (qPCR) reactions composed and performed as previously described (Bendix et al., 2013). qPCR  
224 reactions for normalization employed PCR primers for 18S RNAs (Supplemental Table S1) and  
225 cDNA diluted an additional 1:4000 in water.  $C_q$  values were calculated with the regression  
226 function for each primer set in the Bio-Rad CFX Manager Software (BioRad) and relative  
227 transcript levels calculated as  $2^{-(C_q^{18S} - C_q^{experimental})}$ .

## 228 **Results**

### 229 ***gi-ems1* is a nonsense EMS mutation in sorghum *GI***

230 A single *GI* gene is present in sorghum genome on the short arm of chromosome 3 (position  
231 3:3,821,973-3,830,666; Sobic.003G040900; SORBI\_3003G040900). Publicly available RNA-  
232 seq analysis shows *SbGI* is widely expressed in juvenile and adult tissues, with expression higher  
233 in leaf, shoot, and root-related tissues compared to flower- and seed-associated tissues  
234 (Supplemental Fig. S1A). The sorghum *GI* protein is over 95% identical to maize orthologs *GI1*  
235 and *GI2* and 68% identical to the Arabidopsis *GI* protein (Supplemental Dataset S1).

236 To evaluate the function of *SbGI*, we took advantage of an existing mutant allele in a  
237 collection of M4 EMS-mutagenized BTx623 lines described previously (Jiao et al., 2016). The  
238 ARS223 line carries an EMS-induced G to A mutation in *SbGI* at position 5,656 (Fig. 1A). This  
239 mutant allele, named here *Sbgi-ems1*, introduces a premature stop codon in place of a conserved  
240 tryptophan (W463\*). This allele truncates the normally 1162 residue *SbGI* protein by two thirds  
241 to a 462 amino acid protein (Fig. 1A; Supplemental Dataset S1). Individual plants carrying the  
242 *Sbgi-ems1* allele were identified in the original ARS223 material by PCR genotyping and the  
243 nature of the mutation confirmed by sequencing. One carrier of the *Sbgi-ems1* allele was crossed  
244 to a male sterile ATx623 individual to complete backcross 1 (BC1). The BC1F2 and BC1F3  
245 generations were used to evaluate the function of *SbGI*. BC1F3 plants homozygous for *Sbgi-*  
246 *ems1* have reduced overall and peak expression of *SbGI* compared to normal siblings (Fig. 1B),  
247 as is common for nonsense alleles. Rhythmic *SbGI* expression persists in *Sbgi-ems1* with peak  
248 transcript levels occurring 8 hours after dawn similar to normal plants (Fig. 1B). The nature of  
249 the *Sbgi-ems1* mutation and the reduction in gene expression indicate this allele causes  
250 significant disruption of *SbGI* activity.

251

## 252 **Visible effects of *Sbgi-ems1* on plant growth**

253 Juvenile *Sbgi-ems1* plants exhibited a clear reduction in stature relative to normal siblings. At the  
254 6-7 leaf stage, homozygous F3 mutant plants were on average 3-5 cm shorter in two trials under  
255 LD greenhouse conditions (Fig. 2A). At the same stage, leaf blade growth was also altered in  
256 *Sbgi-ems1* plants. Blades from the 6<sup>th</sup> leaf from juvenile plants were reduced in length and wider  
257 at the midpoint (Fig. 2B; Supplemental Fig. S2A, B), leading to a reduction in the length:width  
258 ratio in mutant leaves (Fig. 2C). Mature *Sbgi-ems1* individuals at the pre-flowering stage were  
259 also visually shorter than normal siblings grown under LD conditions (Fig. 2D). Mature *Sbgi-*  
260 *ems1* plants also exhibited a significant alteration in leaf blade growth, evident as a reduction in  
261 the length:width ratio at the midpoint of the 6<sup>th</sup> leaf below the flag leaf (Fig. 2E). The blade  
262 growth change in *Sbgi-ems1* mature leaves is mostly due to an increase in blade width  
263 (Supplemental Fig. S2 C, D). These observations indicate *SbGI* activity is important for  
264 regulation of both stem and leaf growth in the lateral and proximal-distal directions.

265

## 266 ***Sbgi-ems1* causes delayed flowering**

267 The *Sbgi-ems1* is associated with delayed flowering time under LD greenhouse and field  
268 conditions. To assess whether *SbGI* contributes to sorghum flowering time, a total of 114  
269 individuals from the BC1F2 population were scored for flowering time under LD greenhouse  
270 conditions in three separate trials. Flowering time was initially scored as days to anthesis for  
271 male fertile plants and days to the exertion of stigma for male sterile plants. The timing of each  
272 of these events was indistinguishable within the BC1F2 and BC1F3 groups of plants genotyping  
273 as normal at *SbGI* (Supplemental Fig. S3A). The group of plants homozygous for the *Sbgi-ems1*

274 allele consistently reached anthesis/stigma exertion an average of 35 days later than *gil-ems1*  
275 heterozygous and normal siblings (Fig. S3A). Heterozygous *Sbgi-ems1* plants reached flowering  
276 an average of a week later than normal plants. The late flowering trait tightly co-segregated with  
277 the homozygous *Sbgi-ems1* genotype in this BC1F2 population (Supplemental Fig. S3B). Two  
278 BC1F3 lines each for *Sbgi-ems1* and normal plants were selected from this BC1F2 population for  
279 further analysis.

280 Delayed flowering time was also evident for *Sbgi-ems1* BC1F3 lines. In two separate  
281 greenhouse trials, anthesis or stigma exertion for each BC1F3 *Sbgi-ems1* population occurred an  
282 average of 20 days later than the normal F3 lines under LD conditions (Fig. 3B). The timing of  
283 boot stage, which occurs prior to anthesis, was determined in these trials to get a more complete  
284 idea of the aspect of flowering changed by *Sbgi-ems1*. Similar to the timing of anthesis, boot  
285 stage occurred an average of 20 days later in *Sbgi-ems1* plants (Fig. 3B). The timing of boot  
286 stage was also determined for the third trial with the BC1F2 population. *Sbgi-ems1* homozygotes  
287 in this population were delayed reaching boot stage compared to normal and heterozygous plants  
288 (Supplemental Fig. S3C). The average number of days between boot stage and anthesis/stigma  
289 exertion for *Sbgi-ems1* and normal plants was not different in all greenhouse trials and in the  
290 third trial with the BC1F2 population (Supplemental Fig. S3D). Thus, the flowering time  
291 phenotype of *Sbgi-ems1* plants arises from a delay in achieving boot stage, instead of  
292 lengthening of the time from boot stage to anthesis.

293 BC1F3 generation *Sbgi-ems1* plants produced more internodes than normal siblings. The  
294 number of internodes were counted for the F3 plants from the greenhouse flowering trials. *Sbgi-*  
295 *ems1* mutant plants made an average of 2 to 3 internodes than normal F3 plants (Fig. 3C). While  
296 *Sbgi-ems1* mutants made additional internodes, the length of the main stem of *Sbgi-ems1* plants

297 remained at or below that attained by normal plants (Fig. 3D). These observations are consistent  
298 with an extended vegetative growth phase in *Sbgi-ems1* mutant plants, consistent with the *Sbgi-*  
299 *ems1* allele delaying the timing of the vegetative to floral transition.

300 Flowering time of BC1F3 *Sbgi-ems1* lines was delayed in field grown plants. To test the  
301 importance of GI function to the flowering behavior of field grown plants, days to boot stage was  
302 determined for F3 *Sbgi-ems1* and normal plants grown under LD summer field conditions in  
303 Berkeley CA. Cool temperatures at this field site precluded reliable scoring of anthesis or stigma  
304 exertion in all genotypes. The combined results of two trials indicated that *Sbgi-ems1* plants  
305 reached boot stage more than 25 days later than normal plants (Fig. 3E, F). Clearly, *SbGI*  
306 contributes to the timing of flowering under field conditions, as well as in the greenhouse.

307

### 308 ***Sbgi-ems1* reduces expression of key flowering time genes**

309 The *Sbgi-ems1* allele causes reduced expression of genes that promote flowering. The effect of  
310 the *Sbgi-ems1* allele on expression of flowering-related genes was investigated to understand  
311 molecular changes underlying delayed flowering. Levels of transcripts for florigen-related genes  
312 *SbCN8*, *SbCN12*, and *SbFT* were assessed at 0, 8, and 16 hours after dawn in month-old normal  
313 and *Sbgi-ems1* plants grown under the same greenhouse conditions as the flowering time  
314 experiments. In normal plants, *SbCN8* and *SbFT* transcripts reached peak levels 8 hours after  
315 dawn (Fig. 4A, B), which coincides with the time of maximal *SbGI* expression (Fig. 1B).  
316 *SbCN12* transcripts, on the other hand, were at similar levels in all three time points (Fig. 4C).  
317 *Sbgi-ems1* plants had reduced levels of *SbCN8*, *SbCN12*, and *SbFT* transcripts at all three time  
318 points. The greatest change for *SbCN8* and *SbFT* occurred 8 hours after dawn, where *SbCN8* and  
319 *SbFT* achieved levels 3- and 5-fold lower levels than normal, respectively. *SbCN12* levels were

320 reduced by more than 8-fold at each time point. These observations are consistent with *SbGI*  
321 serving to promote expression of these three florigen-related genes.

322 Since the upstream action of *SbCO* and *Ehd1* control *SbCN8*, *SbCN12*, and *SbFT*, *SbCO* and  
323 *SbEhd1* expression was evaluated in normal and *Sbgi-ems1* plants. *SbCO* transcript was present  
324 throughout the day in normal plants, with highest levels reached 16 hours after dawn (Fig. 4D).  
325 *SbEhd1* expression, on the other hand, was biased toward dawn by 2-fold relative to the 16-hour  
326 time point (Fig. 4E). In *Sbgi-ems1* plants, *SbCO* transcript levels were diminished at both 8 and  
327 16 hours after dawn. In normal plants, *SbEhd1* transcript levels were lower in the *Sbgi-ems1*  
328 background at all time points and the greatest reduction of 2-fold occurred at dawn. These results  
329 indicate *SbGI* promotes expression of the two floral activators *SbCO* and *SbEhd1* under LD  
330 conditions.

331 The expression of the floral repressor *SbPRR37* was also tested to determine whether *SbGI*  
332 contributes to its regulation. In normal plants, *SbPRR37* transcript levels peaked 16 hours after  
333 dawn (Fig. 4F). At all three time points in *Sbgi-ems1*, the *SbPRR37* transcript was below the  
334 basal level observed in normal plants at dawn. Thus, *SbGI* activity contributes to the regulation  
335 of *SbPRR37*.

336 *Sbgi1-ems1* did not alter expression of *SbID1*, a sorghum ortholog of maize *ID1*, an upstream  
337 activator of *SbEhd1* that is not directly regulated by *SbCO*. In normal plants, the highest levels of  
338 *SbID1* transcript occurred at dawn (time 0 hours) and were reduced by half at the time points 8  
339 and 16 hours after dawn (Supplemental Fig. S4A). The *Sbgi-ems1* allele did not change *SbID1*  
340 transcript levels at any time point. Therefore, *SbGI* is not involved in the regulation of *SbID1*.

341

342



343 ***gi-ems1* disrupts a core circadian clock feedback loop involving *SbLHY* and *SbTOC1***

344 The *Sbgi-ems1* allele caused disruption of expression for the circadian clock genes *SbLHY* and  
345 *SbTOC1*, which are expected to regulate one another in a negative feedback loop. Since *GI* genes  
346 participates in circadian clock function, *Sbgi-ems1* plants were evaluated for changes in  
347 expression of the core circadian clock genes *SbTOC1* and *SbLHY*. *SbTOC1* transcript was  
348 evening-expressed with peak levels occurring 16 hours after dawn in normal greenhouse grown  
349 normal plants (Fig. 5B), while *SbLHY* transcript was morning-expressed with peak levels  
350 occurring at dawn (Fig. 5A). In *Sbgi-ems1* plants, *SbTOC1* transcript was elevated relative to  
351 normal levels at all time points, particularly at dawn. On the other hand, the *SbLHY* transcript  
352 was not detectable in mutant plants. These observations indicate *SbGI* activity is for needed for  
353 proper function of an *SbLHY* and *SbTOC1* regulatory negative feedback loop within the sorghum  
354 circadian clock.

## 355 Discussion

356 Identification of an EMS-derived mutation in the *SbGI* gene, *Sbgi-ems1*, allowed us to evaluate  
357 the contribution of *SbGI* to sorghum growth and flowering time. The *Sbgi-ems1* allele is a  
358 premature stop codon that truncates GI protein to two thirds of its normal length. Plants  
359 homozygous for the *Sbgi-ems1* allele have reduced stature and altered leaf growth. The leaf  
360 blade of mutant plants exhibited increased lateral growth and reduced proximal-distal growth,  
361 leading to a distortion of the length:width ratio. *Sbgi-ems1* also plants flower later in LD  
362 conditions after extended vegetative growth. The delay in flowering is accompanied by a  
363 reduction in expression of genes that activate flowering, including the florigen-related genes  
364 *SbFT*, *SbCN8* and *SbCN12*, as well as their upstream regulators *SbCO* and *SbEhd1*. Also,  
365 expression of circadian clock genes is disrupted by the *Sbgi-ems1* allele. These observations  
366 provide insight into the function of *SbGI*, as well as the regulatory networks that determine  
367 flowering time in sorghum.

368 The flowering behavior of *Sbgi-ems1* mutant plants indicates *SbGI* acts early in control of  
369 flowering time. *Sbgi-ems1* delayed flowering time under both greenhouse and field conditions  
370 when flowering was scored for BC1F2 and BC1F3 individuals as either days to reach boot stage  
371 or days to flowering measured as anthesis (for fertile panicles) or stigma exertion (for sterile  
372 panicles); however, the time interval between boot stage and anthesis was unchanged in mutant  
373 plants relative to normal or heterozygous plants. Thus, the >20 additional days *Sbgi-ems1* plants  
374 required to reach flowering represents a delay in physiological processes leading up to boot  
375 stage. These observations indicate the *Sbgi-ems1* allele primarily changes events early in  
376 determination of flowering time, not later processes associated with flower development and/or  
377 release of pollen/stigma exertion.

378 An early role for *SbGI* in flowering time is consistent with the observation that *SbGI* is  
379 necessary for the proper up-regulation of florigen-related genes *SbFT*, *SbCN8* and *SbCN12*. In  
380 normal plants, *SbFT* and *SbCN8* were rhythmically expressed with peak levels occurring at 8  
381 hours after dawn, while *SbCN12* expression reached similar levels across the day. The midday  
382 peak in *SbFT* and *SbCN8* expression coincided with a similarly timed peak in *SbGI* expression.  
383 *Sbgi-ems1* plants, on the other hand, had reduced *SbCN12*, *SbFT* and *SbCN8* expression at each  
384 time point. Rhythmic expression of *SbFT* and *SbCN8* was notably absent in *Sbgi-ems1*, instead  
385 each transcript was present at a low constant level at each time. These results are consistent with  
386 a requirement for *SbGI* activity to promote expression of these three florigen-related genes, in  
387 particular midday expression of *SbFT* and *SbCN8*.

388 *SbGI* appears to promote florigen-related expression through up-regulation of *SbCO* and  
389 *SbEhd1* expression. *SbCO* and *SbEhd1* stimulate florigen gene expression under both LD and SD  
390 conditions (Rebecca L. Murphy et al., 2014; Yang et al., 2014). Additionally, *SbCO* activates  
391 *SbEhd1* expression under all photoperiod conditions. *SbCO* expression is reduced in the *Sbgi-*  
392 *ems1* background, indicating *SbGI* is involved in activation of *SbCO* at the transcriptional level;  
393 however, another possibility that cannot be ruled out is *SbGI*-directed inactivation of an *SbCO*  
394 repressor. Also, *SbEhd1* expression is reduced in *Sbgi-ems1*, which could arise from diminished  
395 *SbCO* or the absence of direct *SbGI* up-regulation of *SbEhd1*. It is notable that the most  
396 significant reduction in *SbEhd1* expression in *Sbgi-ems1* occurs at dawn. This expression pattern  
397 is reminiscent of the loss of morning-induced *OsEhd1* expression in the *osgi-1* mutant (Itoh et  
398 al., 2010). Thus, *SbGI* may contribute to a regulatory “gate” that promotes *SbEhd1* expression in  
399 the morning. *Sbgi-ems1* had no impact on expression of *SbID1*, indicating reduced *SbEhd1*  
400 expression in the mutant background is not due to a lack of up-regulation by *SbID1*.

401 The flowering time delay in *Sbgi-ems1* was unlikely a consequence of reduced SbPRR37  
402 protein-directed repression of *SbEhd1* and *SbCO* even though *SbPRR37* expression was  
403 diminished in the mutant background. The BTx623/ATx623 genetic background used here  
404 carries the *Sbprrr37-3* allele of *mal* that encodes inactive PRR37 (R L Murphy et al., 2011).  
405 Nevertheless, the change in *SbPRR37* expression in *Sbgi-ems1* provides insight into regulation of  
406 *SbPRR37*. Lower *SbPRR37* expression in the *Sbgi-ems1* background could arise from either loss  
407 of direct activation by *SbGI* or an indirect result of a marked disruption of the circadian clock. In  
408 the latter case, strong repression of *SbPRR37* may result from elevated *SbTOCI* expression. In  
409 the Arabidopsis clock system, *TOCI* represses *PRR7* as part of a timed series of repressive  
410 events involving a suite of PRR-family genes (Pokhilko et al., 2012). A reciprocal effect of  
411 *SbPRR37* on *SbTOCI* is unlikely, since *SbPRR37* is not a component of the sorghum circadian  
412 clock as shown by the absence of circadian clock defects in *Sbprrr37/mal* alleles (R L Murphy et  
413 al., 2011).

414 Comparing the observations here for *Sbgi-ems1* to previous work on maize *gil* mutants  
415 highlights interesting differences in the roles played by *GIL* and *SbGI* in these related C4 grasses.  
416 The sorghum *Sbgi-ems1* allele and maize *gil* mutants change growth and flowering time in  
417 opposite directions. While the sorghum *Sbgi-ems1* mutant caused significantly later flowering  
418 under LD conditions, flowering time is modestly accelerated in maize *gil* mutants under LD  
419 photoperiods (Bendix et al., 2013). Additionally, sorghum *Sbgi-ems1* plants had reduced stature,  
420 while maize *gil* mutants grow taller. It is possible to infer from analysis of gene expression that  
421 differences in flowering time between maize and sorghum arise from opposite activities for the  
422 cognate *GI* gene. *SbGI* serves as an activator of *SbCO*, leading to reduced expression of *SbCO*,  
423 *SbEhd1*, and downstream florigen-related genes *SbFT*, *SbCN8*, and *SbCN12* in *Sbgi-ems1*, while

424 maize *gi1* is a repressor of *CONZI*, leading to upregulation of *CONZI* and *ZCN8* in *gi1* mutant  
425 backgrounds.

426 In both maize or sorghum, the genesis of growth changes observed in *gi* mutants remains  
427 unclear. Since Arabidopsis GI protein has been implicated in gibberellin (GA) signaling (Tseng  
428 et al., 2004) and *OsGI* is needed for proper regulation of GA biosynthesis genes (Itoh & Izawa,  
429 2011), it is possible that alterations in gibberellin biosynthesis or signaling underlie the growth  
430 phenotypes observed in sorghum and maize *gi* mutants. If this is the case, then the sorghum and  
431 maize GI proteins are predicted to have opposite regulatory roles there as well.

432 The *Sbgi-ems1* allele disrupted expression of the circadian clock genes *SbLHY* and *SbTOCI*.  
433 This is consistent with alteration of a mutual regulatory feedback loop between *SbLHY* and  
434 *SbTOCI* similar to that described in the Arabidopsis circadian clock (Alabadi et al., 2001;  
435 Gendron et al., 2012; Huang et al., 2012). Interestingly, *TOCI* expression increases and *LHY*  
436 decreases in the *osgi-1* mutant background (Izawa et al., 2011). The similar effect of sorghum  
437 and rice *gi* mutants on *SbTOCI* and *SbLHY* expression indicates comparable circadian clock  
438 regulatory networks exist in these grasses. Also, the SbGI and OsGI proteins appear to be  
439 involved in transcriptional control of *TOCI* expression. By contrast, Arabidopsis GI protein  
440 serves to regulate TOC1 protein activity at the post-transcriptional level (Kim et al., 2007;  
441 Martin-Tryon, Kreps, & Harmer, 2007). These observations indicate regulation of *TOCI* activity  
442 by *GI* is a conserved feature of plant circadian clocks, but the underlying molecular mechanisms  
443 are potentially different between plant species.

444 **Acknowledgements**

445 Thank you to Emma Kovak and Carine Marshall for feedback and advice. We thank Lia Poasa  
446 and Julie Calfas at PGEC greenhouse and Tina Wistrom, and Al Hunter at UC Berkeley  
447 Greenhouse Facilities for excellent care of plants. Julianne Elliot and Parkesh Suseendran  
448 provided invaluable technical assistance. This work was supported by USDA-ARS CRIS  
449 projects 2030-21000-039-00D and 2030-21000-049-00D to F.G.H.

450

451 **Supplemental Files**

452 Supplemental Table S1. Primers used in this study.

453 Supplemental Figure S1. *SbGI* expression in various sorghum tissues.

454 Supplemental Figure S2. Length and width measurements of leaf blades from juvenile and  
455 mature plants.

456 Supplemental Figure S3. Late flowering of *Sbgi-ems1* plants arises from delayed boot stage.

457 Supplemental Figure S4. Expression of floral activator *SbIDI* in *Sbgi-ems1*.

458 Supplemental Dataset S1. Amino acid alignment of GI proteins from sorghum, maize, and  
459 Arabidopsis.

## References

- Alabadi, D., Oyama, T., Yanovsky, M. J., Harmon, F. G., Mas, P., Kay, S. A., ... Kay, S. A. (2001). Reciprocal regulation between TOC1 and LHY/CCA1 within the Arabidopsis circadian clock. *Science*, *293*(5531), 880–883. <http://doi.org/10.1126/science.1061320>
- Bendix, C., Mendoza, J. M., Stanley, D. N., Meeley, R., & Harmon, F. G. (2013). The circadian clock-associated gene *gigantea1* affects maize developmental transitions. *Plant, Cell and Environment*, *36*(7), 1379–1390.
- Bhosale, S. U., Stich, B., Rattunde, H. F. W., Weltzien, E., Haussmann, B. I. G., Hash, C. T., ... Parzies, H. K. (2012). Association analysis of photoperiodic flowering time genes in west and central African sorghum [*Sorghum bicolor* (L.) Moench]. *BMC Plant Biology*, *12*(1), 32. <http://doi.org/10.1186/1471-2229-12-32>
- Colasanti, J., Yuan, Z., & Sundaresan, V. (1998). The indeterminate gene encodes a zinc finger protein and regulates a leaf-generated signal required for the transition to flowering in maize. *Cell*, *93*(4), 593–603. [http://doi.org/10.1016/S0092-8674\(00\)81188-5](http://doi.org/10.1016/S0092-8674(00)81188-5)
- Craufurd, P. Q., Mahalakshmi, V., Bidinger, F. R., Mukuru, S. Z., Chanterreau, J., Omanga, P. A., ... Hammer, G. L. (1999). Adaptation of sorghum: Characterisation of genotypic flowering responses to temperature and photoperiod. *Theoretical and Applied Genetics*, *99*(5), 900–911. <http://doi.org/10.1007/s001220051311>
- Danilevskaya, O. N., Meng, X., Hou, Z., Ananiev, E. V., & Simmons, C. R. (2008). A genomic and expression compendium of the expanded PEBP gene family from maize. *Plant Physiology*, *146*(1), 250–264. <http://doi.org/10.1104/pp.107.109538>
- Doi, K., Izawa, T., Fuse, T., Yamanouchi, U., Kubo, T., Shimatani, Z., ... Yoshimura, A. (2004). Ehd1, a B-type response regulator in rice, confers short-day promotion of flowering and

- controls FT-like gene expression independently of Hd1. *Genes & Development*, *18*(8), 926–936. <http://doi.org/10.1101/gad.1189604>
- Farre, E. M., & Liu, T. (2013). The PRR family of transcriptional regulators reflects the complexity and evolution of plant circadian clocks. *Current Opinion in Plant Biology*, *16*(5), 621–629. <http://doi.org/10.1016/j.pbi.2013.06.015> S1369-5266(13)00098-8 [pii]
- Gendron, J. M., Pruneda-Paz, J. L., Doherty, C. J., Gross, A. M., Kang, S. E., & Kay, S. A. (2012). Arabidopsis circadian clock protein, TOC1, is a DNA-binding transcription factor. *Proceedings of the National Academy of Sciences of the United States of America*, *109*(8), 3167–3172. <http://doi.org/1200355109> [pii]10.1073/pnas.1200355109
- Griffiths, S., Dunford, R. P., Coupland, G., & Laurie, D. A. (2003). The evolution of CONSTANS-like gene families in barley, rice, and Arabidopsis. *Plant Physiology*, *131*(4), 1855–1867.
- Huang, W., Perez-Garcia, P., Pokhilko, a., Millar, a. J., Antoshechkin, I., Riechmann, J. L., & Mas, P. (2012). Mapping the core of the Arabidopsis circadian clock defines the network structure of the oscillator. *Science*, *336*(6077), 75–79. <http://doi.org/science.1219075> [pii]10.1126/science.1219075
- Itoh, H., & Izawa, T. (2011). A study of phytohormone biosynthetic gene expression using a circadian clock-related mutant in rice. *Plant Signaling & Behavior*, *6*(12), 1932–6. <http://doi.org/10.4161/PSB.6.12.18207>
- Itoh, H., Nonoue, Y., Yano, M., & Izawa, T. (2010). A pair of floral regulators sets critical day length for Hd3a florigen expression in rice. *Nature Genetics*, *42*(7), 635–638. <http://doi.org/10.1038/ng.606>
- Izawa, T., Mihara, M., Suzuki, Y., Gupta, M., Itoh, H., Nagano, A. J., ... Nagamura, Y. (2011).



Os-GIGANTEA confers robust diurnal rhythms on the global transcriptome of rice in the field. *Plant Cell*, 23(5), 1741–1755. <http://doi.org/tpc.111.083238> [pii]

10.1105/tpc.111.083238

Jaeger, K. E., & Wigge, P. A. (2007). FT protein acts as a long-range signal in Arabidopsis.

*Current Biology*, 17(12), 1050–1054.

Jiao, Y., Burke, J., Chopra, R., Burow, G., Chen, J., Wang, B., ... Xin, Z. (2016). A Sorghum

Mutant Resource as an Efficient Platform for Gene Discovery in Grasses. *The Plant Cell*,

28(7), 1551–62. <http://doi.org/10.1105/tpc.16.00373>

Kim, W.-Y. Y., Fujiwara, S., Suh, S.-S. S., Kim, J., Kim, Y., Han, L., ... Somers, D. E. (2007).

ZEITLUPE is a circadian photoreceptor stabilized by GIGANTEA in blue light. *Nature*,

449(7160), 356–360. <http://doi.org/10.1038/nature06132>

Kojima, S., Takahashi, Y., Kobayashi, Y., Monna, L., Sasaki, T., Araki, T., & Yano, M. (2002).

Hd3a, a rice ortholog of the Arabidopsis FT Gene, promotes transition to flowering

downstream of Hd1 under short-day conditions. *Plant and Cell Physiology*, 43(10), 1096–

1105. <http://doi.org/10.1093/pcp/pcf156>

Koornneef, M., Hanhart, C. J., & van der Veen, J. H. (1991). A genetic and physiological

analysis of late flowering mutants in Arabidopsis thaliana. *Molecular and General*

*Genetics*, 229(1), 57–66. Retrieved from

<http://www.ncbi.nlm.nih.gov/entrez/query.fcgi?cmd=Retrieve&db=PubMed&dopt=Citation>

&list\_uids=1896021

Lifschitz, E., Eviatar, T., Rozman, A., Shalit, A., Goldshmidt, A., Amsellem, Z., ... Eshed, Y.

(2006). The tomato FT ortholog triggers systemic signals that regulate growth and

flowering and substitute for diverse environmental stimuli. *Proceedings of the National*

- Academy of Sciences*, 103(16), 6398–6403. <http://doi.org/10.1073/pnas.0601620103>
- Lin, M.-K., Belanger, H., Lee, Y.-J., Varkonyi-Gasic, E., Taoka, K.-I., Miura, E., ... Lucas, W. J. (2007). FLOWERING LOCUS T Protein May Act as the Long-Distance Florigenic Signal in the Cucurbits. *THE PLANT CELL ONLINE*, 19(5), 1488–1506.  
<http://doi.org/10.1105/tpc.107.051920>
- Martin-Tryon, E. L., Kreps, J. A., & Harmer, S. L. (2007). GIGANTEA acts in blue light signaling and has biochemically separable roles in circadian clock and flowering time regulation. *Plant Physiology*, 143(1), 473–486. <http://doi.org/10.1104/pp.106.088757>
- Mas, P., Kim, W. Y., Somers, D. E., & Kay, S. A. (2003). Targeted degradation of TOC1 by ZTL modulates circadian function in *Arabidopsis thaliana*. *Nature*, 426(6966), 567–570.
- Matsubara, K., Yamanouchi, U., Wang, Z.-X., Minobe, Y., Izawa, T., & Yano, M. (2008). Ehd2, a Rice Ortholog of the Maize INDETERMINATE1 Gene, Promotes Flowering by Up-Regulating Ehd1. *Plant Physiology*, 148(3), 1425–1435.  
<http://doi.org/10.1104/pp.108.125542>
- Meng, X., Muszynski, M. G., & Danilevskaya, O. N. (2011). The FT-like ZCN8 gene functions as a floral activator and is involved in photoperiod sensitivity in maize. *Plant Cell*, 23(3), 942–960. <http://doi.org/tpc.110.081406> [pii]10.1105/tpc.110.081406
- Miller, T. A., Muslin, E. H., & Dorweiler, J. E. (2008). A maize CONSTANS-like gene, *conz1*, exhibits distinct diurnal expression patterns in varied photoperiods. *Planta*, 227(6), 1377–1388. <http://doi.org/10.1007/s00425-008-0709-1>
- Mishra, P., & Panigrahi, K. C. (2015). GIGANTEA - an emerging story. *Frontiers in Plant Science*, 6, 8. <http://doi.org/10.3389/fpls.2015.00008>
- Mullet, J., Morishige, D., McCormick, R., Truong, S., Hilley, J., McKinley, B., ... Rooney, W.

- (2014). Energy sorghum--a genetic model for the design of C4 grass bioenergy crops. *Journal of Experimental Botany*, 65(13), 3479–3489.  
<http://doi.org/10.1093/jxb/eru229eru229> [pii]
- Murphy, R. L., Klein, R. R., Morishige, D. T., Brady, J. A., Rooney, W. L., Miller, F. R., ... Mullet, J. E. (2011). Coincident light and clock regulation of pseudoresponse regulator protein 37 (PRR37) controls photoperiodic flowering in sorghum. *Proceedings of the National Academy of Sciences of the United States of America*, 108(39), 16469–16474.  
<http://doi.org/1106212108> [pii]10.1073/pnas.1106212108
- Murphy, R. L., Morishige, D. T., Brady, J. a., Rooney, W. L., Yang, S., Klein, P. E., & Mullet, J. E. (2014). Gh7 (Ma6) Represses Sorghum Flowering in Long Days: Alleles Enhance Biomass Accumulation and Grain Production. *The Plant Genome*, 7(2), 1–10.  
<http://doi.org/10.3835/plantgenome2013.11.0040>
- Notaguchi, M., Abe, M., Kimura, T., Daimon, Y., Kobayashi, T., Yamaguchi, A., ... Araki, T. (2008). Long-Distance, Graft-Transmissible Action of Arabidopsis FLOWERING LOCUS T Protein to Promote Flowering. *Plant and Cell Physiology*, 49(11), 1645–1658.  
<http://doi.org/10.1093/pcp/pcn154>
- Park, D. H., Somers, D. E., Kim, Y. S., Choy, Y. H., Lim, H. K., Soh, M. S., ... Nam, H. G. (1999). Control of circadian rhythms and photoperiodic flowering by the Arabidopsis GIGANTEA gene. *Science*, 285(5433), 1579–1582.
- Pennazio, S. (2004). “Florigen”: An intriguing concept of plant biology. *Rivista Di Biologia*, 97(1), 33–52. Retrieved from <http://www.ncbi.nlm.nih.gov/pubmed/15648209>
- Pokhilko, A., Fernández, A. P., Edwards, K. D., Southern, M. M., Halliday, K. J., Millar, A. J., ... Millar, A. J. (2012). The clock gene circuit in Arabidopsis includes a repressilator with

additional feedback loops. *Molecular Systems Biology*, 8(574), 574.

<http://doi.org/10.1038/msb.2012.6>

Putterill, J., Robson, F., Lee, K., Simon, R., & Coupland, G. (1995). The CONSTANS gene of *Arabidopsis* promotes flowering and encodes a protein showing similarities to zinc finger transcription factors. *Cell*, 80(6), 847–857. [http://doi.org/10.1016/0092-8674\(95\)90288-0](http://doi.org/10.1016/0092-8674(95)90288-0)

Quinby, J. R. (1967). The maturity genes of sorghum. In A. G. Norman (Ed.), *Advances in Agronomy* (Vol. 19, pp. 267–305). New York: Academic Press.

Quinby, J. R. (1974). *Sorghum improvement and the genetics of growth*. College Station, TX:

Texas A&M University Press. Retrieved from

<http://books.google.com/books?id=7RchAQAAMAAJ>

Redei, G. P. (1962). Supervital mutants of *Arabidopsis*. *Genetics*, 47(4), 443–460. Retrieved from <http://www.ncbi.nlm.nih.gov/pubmed/17248096>

Samach, A., Onouchi, H., Gold, S. E., Ditta, G. S., Schwarz-Sommer, Z., Yanofsky, M. F., & Coupland, G. (2000). Distinct roles of CONSTANS target genes in reproductive development of *Arabidopsis*. *Science*, 288(5471), 1613–1616.

<http://doi.org/10.1126/science.288.5471.1613>

Sawa, M., & Kay, S. A. (2011). GIGANTEA directly activates Flowering Locus T in *Arabidopsis thaliana*. *Proceedings of the National Academy of Sciences of the United States of America*, 108(28), 11698–11703. <http://doi.org/1106771108>

[pii]10.1073/pnas.1106771108

Sawa, M., Nusinow, D. A., Kay, S. A., & Imaizumi, T. (2007). FKF1 and GIGANTEA complex formation is required for day-length measurement in *Arabidopsis*. *Science*, 318(5848), 261–265. <http://doi.org/1146994> [pii]10.1126/science.1146994

- Song, Y. H., Shim, J. S., Kinmonth-Schultz, H. A., & Imaizumi, T. (2015). Photoperiodic Flowering: Time Measurement Mechanisms in Leaves. *Annual Review of Plant Biology*, 66(1), 441–464. <http://doi.org/10.1146/annurev-arplant-043014-115555>
- Song, Y. H., Smith, R. W., To, B. J., Millar, A. J., & Imaizumi, T. (2012). FKF1 Conveys Timing Information for CONSTANS Stabilization in Photoperiodic Flowering. *Science*, 336(6084), 1045–1049. <http://doi.org/10.1126/science.1219644>
- Suarez-Lopez, P., Wheatley, K., Robson, F., Onouchi, H., Valverde, F., Coupland, G., ... Coupland, G. (2001). CONSTANS mediates between the circadian clock and the control of flowering in Arabidopsis. *Nature*, 410(6832), 1116–1120. <http://doi.org/10.1038/35074138>
- Tamaki, S., Matsuo, S., Wong, H. L., Yokoi, S., & Shimamoto, K. (2007). Hd3a protein is a mobile flowering signal in rice. *Science*, 316(5827), 1033–1036.
- Tseng, T.-S. S., Salomé, P. A., McClung, C. R., Olszewski, N. E., Salome, P. A., McClung, C. R., & Olszewski, N. E. (2004). SPINDLY and GIGANTEA interact and act in Arabidopsis thaliana pathways involved in light responses, flowering, and rhythms in cotyledon movements. *Plant Cell*, 16(6), 1550–1563. <http://doi.org/10.1105/tpc.019224>
- Turck, F., Fornara, F., & Coupland, G. (2008). Regulation and identity of florigen: FLOWERING LOCUS T moves center stage. *Annual Review of Plant Biology*, 59(1), 573–594. <http://doi.org/10.1146/annurev.arplant.59.032607.092755>
- Valverde, F., Mouradov, A., Soppe, W., Ravenscroft, D., Samach, A., & Coupland, G. (2004). Photoreceptor regulation of CONSTANS protein in photoperiodic flowering. *Science*, 303(5660), 1003–1006. <http://doi.org/10.1126/science.1091761>
- Wolabu, T. W., Zhang, F., Niu, L., Kalve, S., Bhatnagar-Mathur, P., Muszynski, M. G., & Tadege, M. (2016). Three FLOWERING LOCUS T-like genes function as potential

florigens and mediate photoperiod response in sorghum. *New Phytologist*, 210(3), 946–959.

<http://doi.org/10.1111/nph.13834>

Yang, S., Weers, B. D., Morishige, D. T., & Mullet, J. E. (2014). CONSTANS is a photoperiod regulated activator of flowering in sorghum. *BMC Plant Biology*, 14(1), 148.

<http://doi.org/10.1186/1471-2229-14-148>

Yano, M., Katayose, Y., Ashikari, M., Yamanouchi, U., Monna, L., Fuse, T., ... Sasaki, T. (2000). Hd1, a major photoperiod sensitivity quantitative trait locus in rice, is closely related to the Arabidopsis flowering time gene CONSTANS. *Plant Cell*, 12(12), 2473–2484.

Zhao, J., Chen, H., Ren, D., Tang, H., Qiu, R., Feng, J., ... Guo, J. (2015). Genetic interactions between diverged alleles of Early heading date 1 (Ehd1) and Heading date 3a (Hd3a)/ RICE FLOWERING LOCUS T1 (RFT1) control differential heading and contribute to regional adaptation in rice (*Oryza sativa*). *The New Phytologist*, 208(3), 936–48.

<http://doi.org/10.1111/nph.13503>

## Figure Legends

### **Figure 1. The *Sbgi-ems1* mutant is a nonsense allele that results in reduced *SbGI***

**expression.** A) Diagram of *SbGI* gene (Sobic.003G040900; SORBI\_3003G040900) where boxes indicate exons and lines introns. Red coloring indicates coding sequence with the arrow at start codon and white regions indicating 5'- and 3'-UTRs. Vertical line above indicates the position and nature of the *Sbgi-ems1*. B) Transcript levels for *SbGI* in leaves of normal (white bars) and *Sbgi-ems1* (black bars) BC1F3 plants at 6<sup>th</sup> leaf stage grown under LD conditions. Time after dawn is the number of hours after lights on in the morning. Values are the average of two biological replicates normalized to the time point from normal plants with highest transcript levels. Error bars represent the range of two biological replicates.

### **Figure 2. *Sbgi-ems1* reduces plant stature and changes the orientation of leaf growth.**

Height (A), representative 6<sup>th</sup> leaves (B), and length:width ratio of blades from 6<sup>th</sup> leaves (C) of BC1F3 juvenile normal (circles) and *Sbgi-ems1* (triangles) plants grown to the 6-7 leaf stage. D) Representative 2-month-old pre-flowering normal and *Sbgi-ems1* plants. E) Length:width ratio of blades from 6<sup>th</sup> leaf below flag leaf on BC1F3 mature post-flowering normal (circles) and *Sbgi-ems1* (triangles) plants. All plants were grown under LD greenhouse conditions. Length:width ratio was calculated from length and width measurements in Supplemental Figure S2. All measurements are shown from two separate trials, bar represents the average of measurements. Statistical significance is indicated according to a two-tailed unpaired t-tests with Welch's correction at P value <0.0001 (\*\*\*\*), <0.001 (\*\*\*), <0.01 (\*\*) and <0.05 (\*).

**Figure 3. *Sbgi-ems1* mutants are late flowering and produce more internodes prior to flowering.** A) Flowering time for BC1F2 population for normal (circles), heterozygous *Sbgi-ems1/SbGI* (squares), and *Sbgi-ems1* (triangles) plants grown under LD greenhouse conditions determined as days to anthesis (fertile plants) or stigma exertion (male sterile plants). B) Flowering time for BC1F3 normal (circles) and *Sbgi-ems1* (triangles) plants grown under LD greenhouse conditions determined as days to boot stage (DTB) and days to anthesis or stigma exertion (DTA/S). C) Number of internodes (Nodes) above prop roots produced by normal (circles) and *Sbgi-ems1* (triangles) BC1F3 plants from flowering time experiments. D) Representative main stems after leaf removal from normal and *Sbgi-ems1* plants from flowering time experiments under greenhouse conditions. E) Flowering time for BC1F3 normal (circles) and *Sbgi-ems1* (triangles) plants grown under summer field conditions determined as days to boot stage. F) Pictures of representative 3-month-old normal and *Sbgi-ems1* plants grown in the field. All measurements are shown from two separate trials, bar represents the average of measurements. Statistical significance is indicated according to a two-tailed unpaired t-tests with Welch's correction at P value <0.0001 (\*\*\*\*), <0.001 (\*\*\*), <0.01 (\*\*) and <0.05 (\*).

**Figure 4. *Sbgi-ems1* alters flowering time gene expression patterns and levels.** Transcript levels for *SbCN8* (A), *SbFT* (B), *SbCN12* (C), *SbCO* (D), *SbEhd1* (E), and *SbPRR37* (F) in leaves of normal (white bars) and *Sbgi-ems1* (black bars) BC1F3 plants at 6<sup>th</sup> leaf stage grown under LD conditions. Time after dawn is the number of hours after lights on in the morning. Values are the average of two biological replicates normalized to the time point from normal plants with highest transcript levels. Error bars represent the range of two biological replicates.



**Figure 5. *Sbgi-ems1* disrupts *SbLHY* and *SbTOC1* expression.** Transcript levels for *SbLHY* (A) and *SbTOC1* (B) in leaves of normal (white bars) and *Sbgi-ems1* (black bars) BC1F3 plants at 6<sup>th</sup> leaf stage grown under LD conditions. Time after dawn is the number of hours after supplemental lights came on in the morning. Values are the average of two biological replicates normalized to the time point from normal plants with highest transcript levels. Error bars represent the range of two biological replicates.

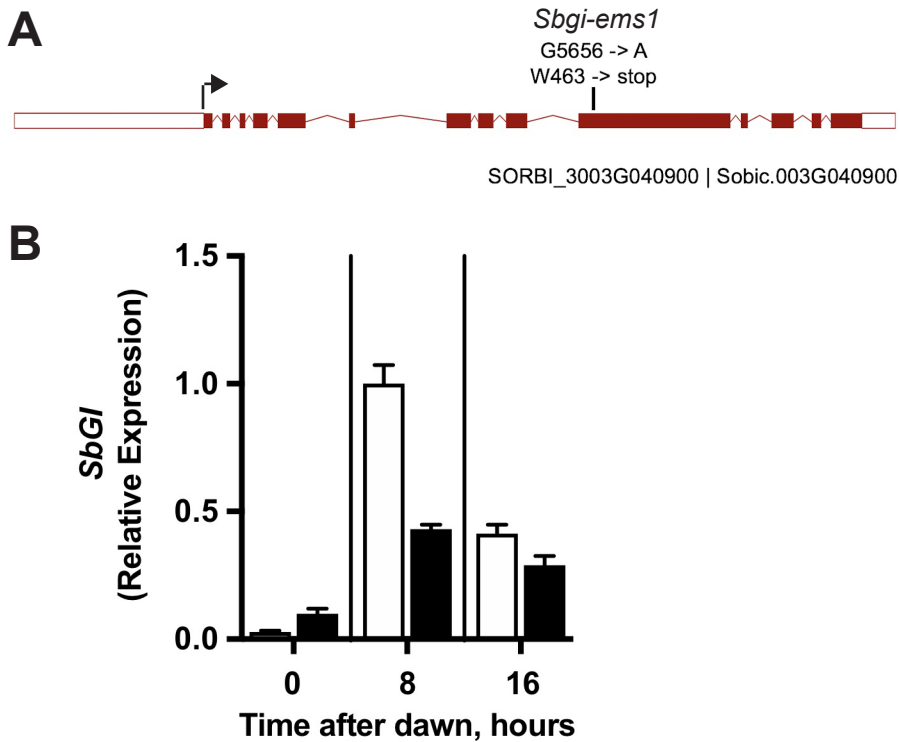

**Figure 1. The *Sbgi-ems1* mutant is a nonsense allele that results in reduced *SbGl* expression.** A) Diagram of *SbGl* gene (Sobic.003G040900; SORBI\_3003G040900) where boxes indicate exons and lines introns. Red coloring indicates coding sequence with the arrow at start codon and white regions indicating 5'- and 3'-UTRs. Vertical line above indicates the position and nature of the *Sbgi-ems1*. B) Transcript levels for *SbGl* in leaves of normal (white bars) and *Sbgi-ems1* (black bars) BC1F3 plants at 6<sup>th</sup> leaf stage grown under LD conditions. Time after dawn is the number of hours after lights on in the morning. Values are the average of two biological replicates normalized to the time point from normal plants with highest transcript levels. Error bars represent the range of two biological replicates.

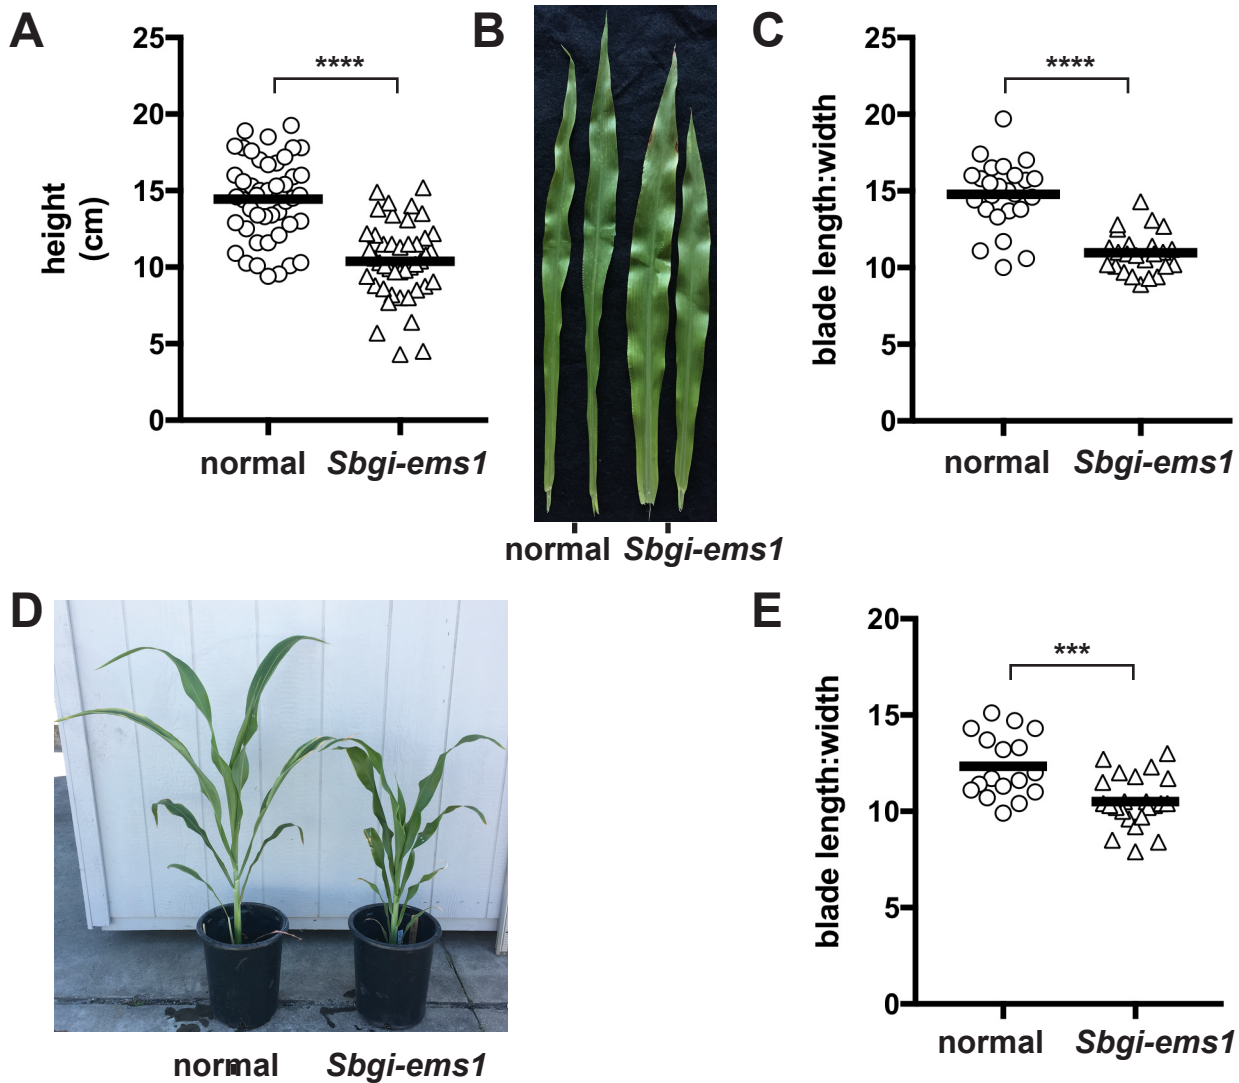

**Figure 2. *Sbgi-ems1* reduces plant stature and changes the orientation of leaf growth.** Height (A), representative 6<sup>th</sup> leaves (B), and length:width ratio of blades from 6<sup>th</sup> leaves (C) of BC1F3 juvenile normal (circles) and *Sbgi-ems1* (triangles) plants grown to the 6-7 leaf stage. D) Representative 2-month-old pre-flowering normal and *Sbgi-ems1* plants. E) Length:width ratio of blades from 6<sup>th</sup> leaf below flag leaf on BC1F3 mature post-flowering normal (circles) and *Sbgi-ems1* (triangles) plants. All plants were grown under LD greenhouse conditions. Length:width ratio was calculated from length and width measurements in Supplemental Figure 2. All measurements are shown from two separate trials, bar represents the average of measurements. Statistical significance is indicated according to a two-tailed unpaired t-tests with Welch's correction at P value <0.0001 (\*\*\*\*), <0.001 (\*\*\*), <0.01 (\*\*) and <0.05 (\*).

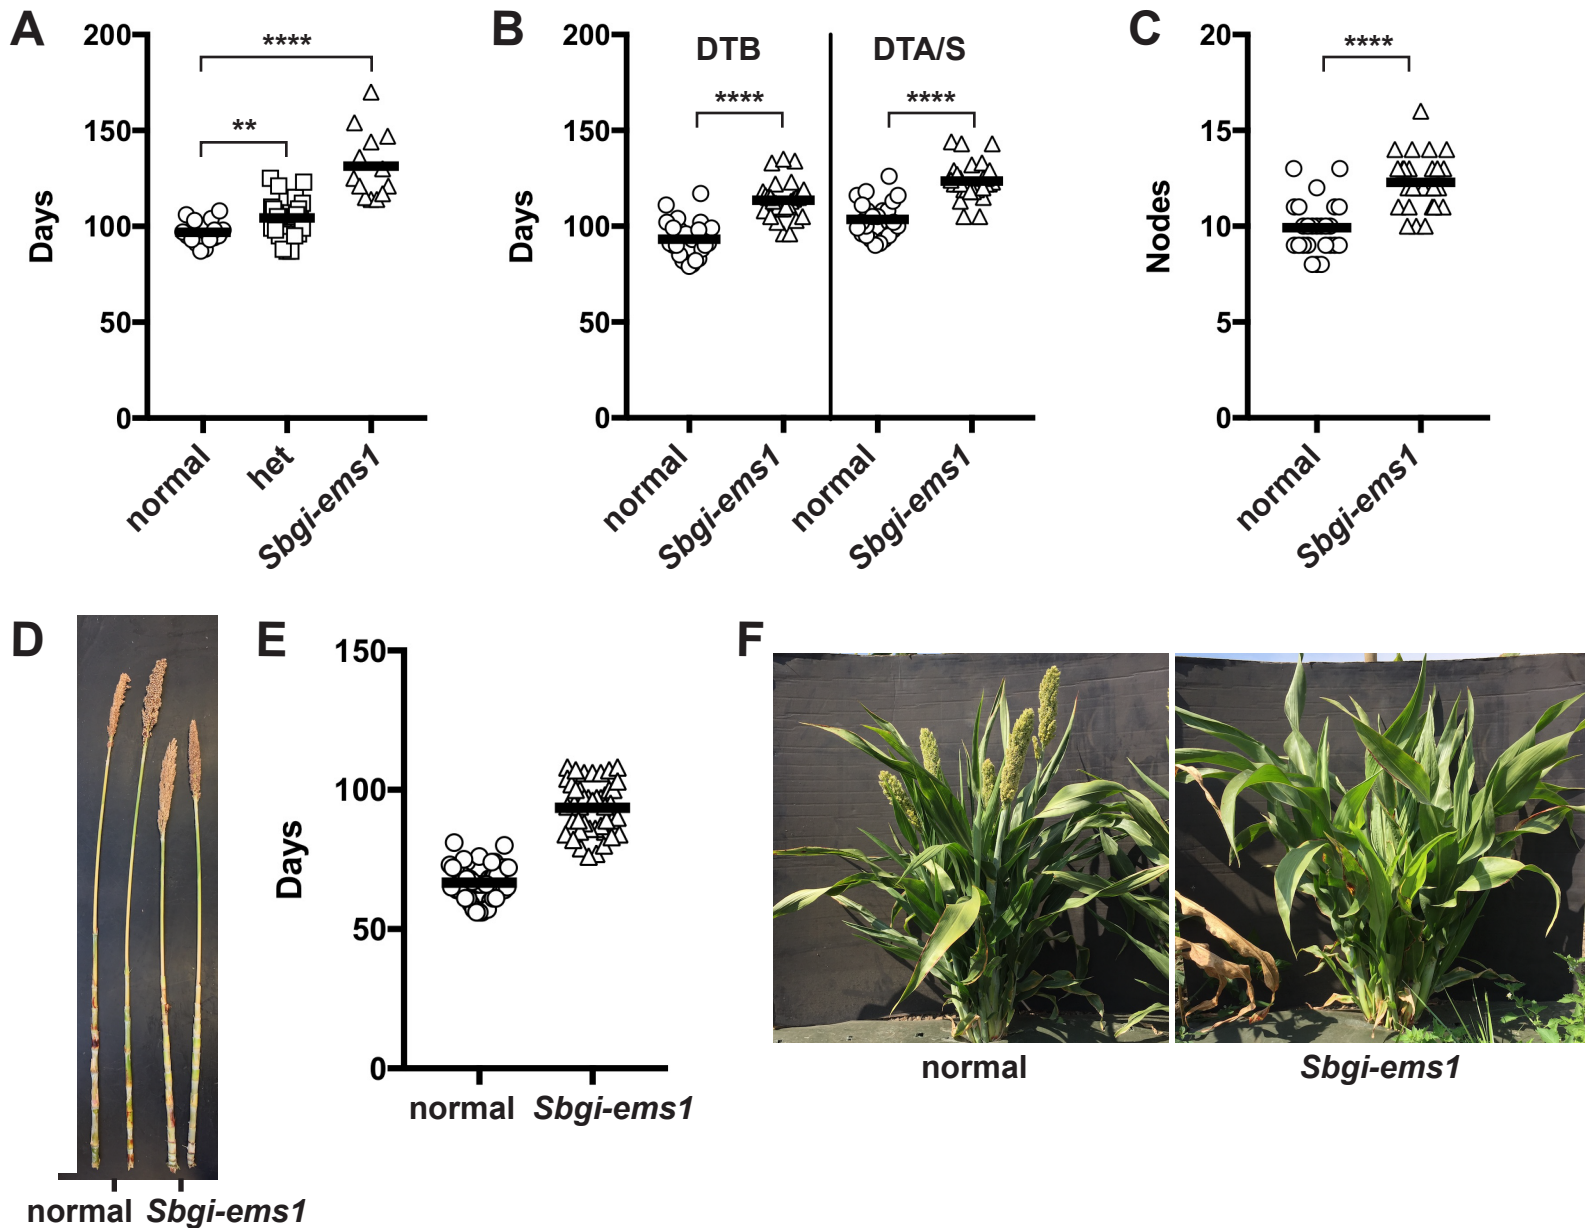

**Figure 3. *Sbgj-ems1* mutants are late flowering and produce more internodes prior to flowering.** A) Flowering time for BC1F2 population for normal (circles), heterozygous *Sbgj-ems1/SbGl* (squares), and *Sbgj-ems1* (triangles) plants grown under LD greenhouse conditions determined as days to anthesis (fertile plants) or stigma exertion (male sterile plants). B) Flowering time for BC1F3 normal (circles) and *Sbgj-ems1* (triangles) plants grown under LD greenhouse conditions determined as days to boot stage (DTB) and days to anthesis or stigma exertion (DTA/S). C) Number of internodes (Nodes) above prop roots produced by normal (circles) and *Sbgj-ems1* (triangles) BC1F3 plants from flowering time experiments. D) Representative main stems after leaf removal from normal and *Sbgj-ems1* plants from flowering time experiments under greenhouse conditions. E) Flowering time for BC1F3 normal (circles) and *Sbgj-ems1* (triangles) plants grown under summer field conditions determined as days to boot stage. F) Pictures of representative 3-month-old normal and *Sbgj-ems1* plants grown in the field. All measurements are shown from two separate trials, bar represents the average of measurements. Statistical significance is indicated according to a two-tailed unpaired t-tests with Welch's correction at P value <0.0001 (\*\*\*\*), <0.001 (\*\*\*), <0.01 (\*\*) and <0.05 (\*).

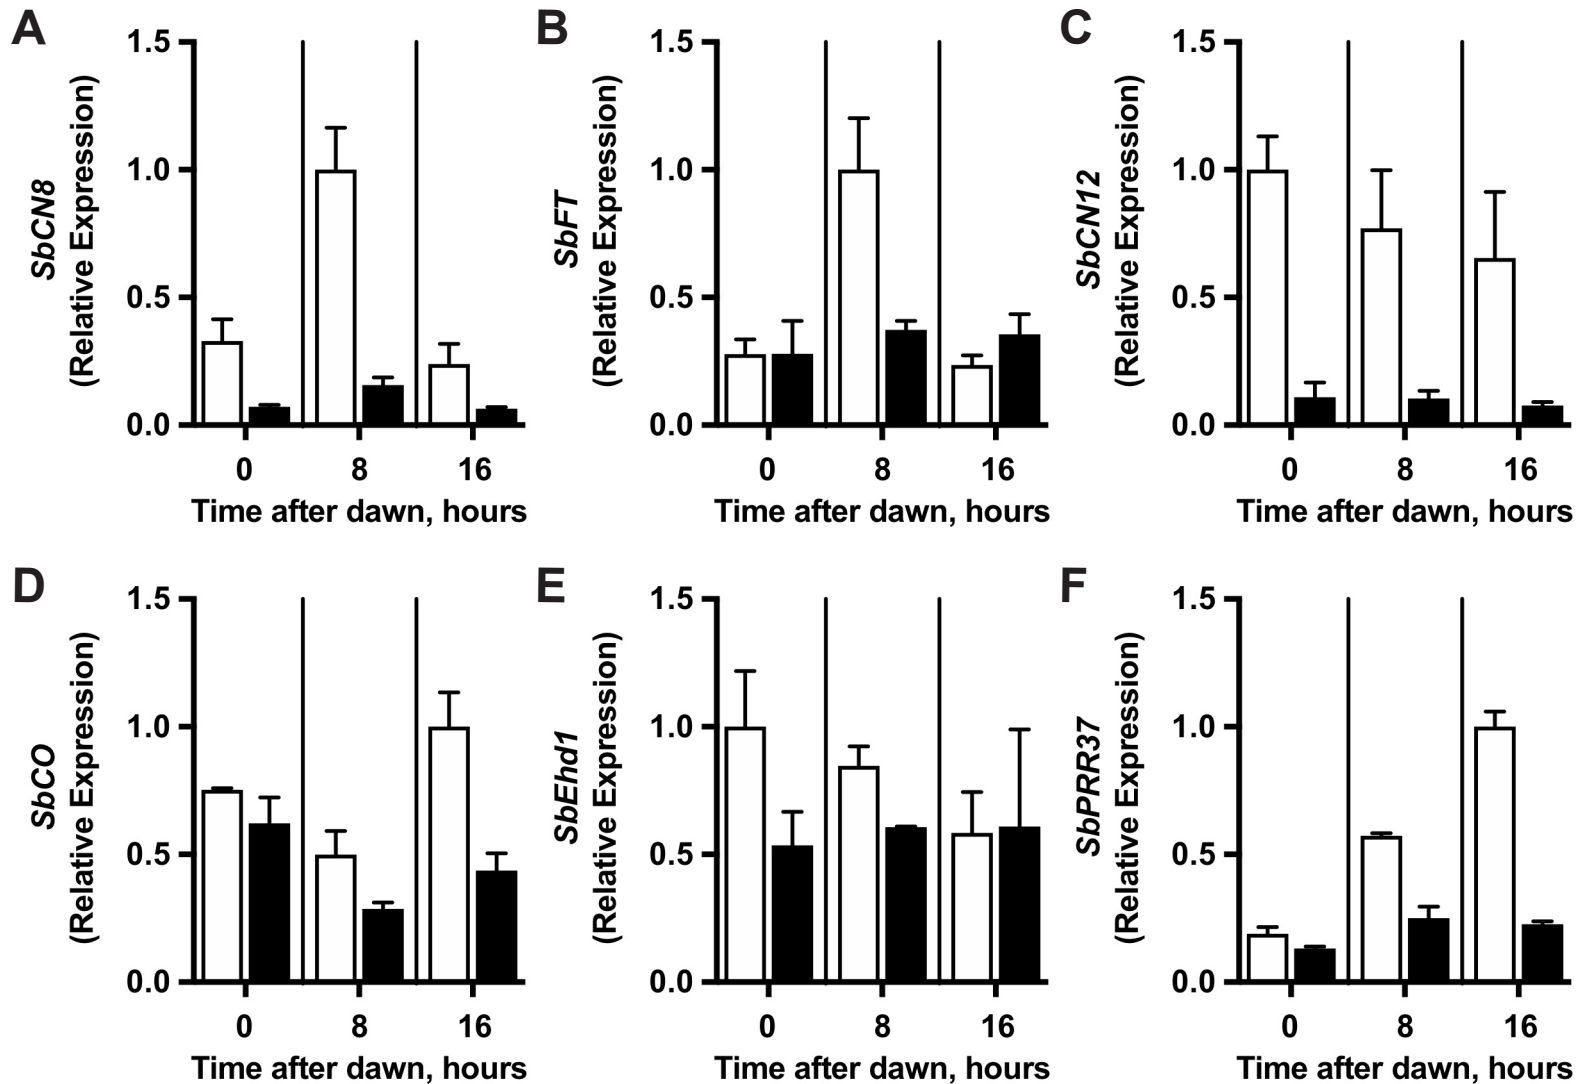

**Figure 4. *SbgI-ems1* alters flowering time gene expression patterns and levels.**

Transcript levels for *SbcN8* (A), *SbFT* (B), *SbcN12* (C), *SbcCO* (D), *SbEhd1* (E), and *SbPRR37* (F) in leaves of normal (white bars) and *SbgI-ems1* (black bars) BC1F3 plants at 6<sup>th</sup> leaf stage grown under LD conditions. Time after dawn is the number of hours after lights on in the morning. Values are the average of two biological replicates normalized to the time point from normal plants with highest transcript levels. Error bars represent the range of two biological replicates.

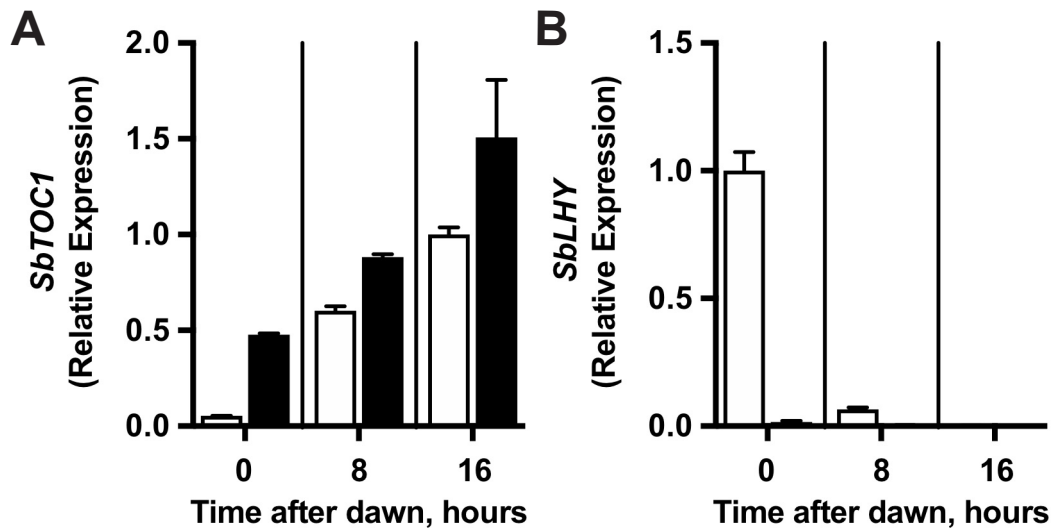

**Figure 5. *Sbgi-ems1* disrupts *SbLHY* and *SbTOC1* expression.** Transcript levels for *SbLHY* (A) and *SbTOC1* (B) in leaves of normal (white bars) and *Sbgi-ems1* (black bars) BC1F3 plants at 6<sup>th</sup> leaf stage grown under LD conditions. Time after dawn is the number of hours after supplemental lights came on in the morning. Values are the average of two biological replicates normalized to the time point from normal plants with highest transcript levels. Error bars represent the range of two biological replicates.
